# Supplementary material for: An electrochemically functional layer of hydrogenase extract on an electrode of large and tunable specific surface area
Source: Royal Society of Chemistry journal article supplement (doi:10.1039/c6ta00392c), 2016-01-01
Supplement: c6ta00392c1.pdf [file c6ta00392c1.pdf]

Electronic Supplementary Information to:

## An electrochemically functional layer of hydrogenase extract on an electrode of large and tunable specific surface area

Stefanie Schlicht,<sup>a</sup> Loïc Assaud,<sup>a,‡</sup> Moritz Hansen,<sup>b</sup> Markus Licklederer,<sup>a</sup>  
Mikhael Bechelany,<sup>c</sup> Mirjam Perner<sup>b</sup> and Julien Bachmann<sup>a,\*</sup>

<sup>a</sup> Friedrich-Alexander University Erlangen-Nürnberg, Department of Chemistry and Pharmacy, Egerlandstrasse 1, D-91058 Erlangen, Germany

<sup>b</sup> University of Hamburg, Faculty of Mathematics, Informatics and Biology, Biozentrum Klein Flottbek, Ohnhorststrasse 18, D-22609 Hamburg, Germany

<sup>c</sup> Institut Européen des Membranes, IEMM, ENSCM UM2 CNRS UMR5635, Place Eugène Bataillon, F-34095 Montpellier Cedex 5, France

‡ Current address: ICMMO – Bât. 410, Université Paris-Sud 11, Rue du Doyen Georges Poitou, F-91405 Orsay Cedex, France

\* Corresponding author: julien.bachmann@fau.de

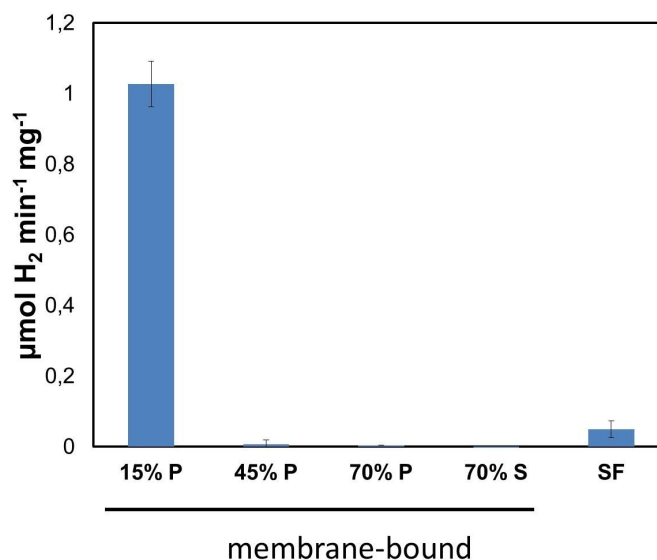

**Figure S1.** H<sub>2</sub> uptake activity of the different *E. coli* enzyme fractions. Enzyme activities were determined after precipitation by different concentrations of ammonium sulfate and resuspension of the pellet (membrane-fraction), in the supernatant after precipitation at 70% ammonium sulfate and of soluble enzymes. P, resuspended pellet; S, supernatant; SF, soluble fraction.

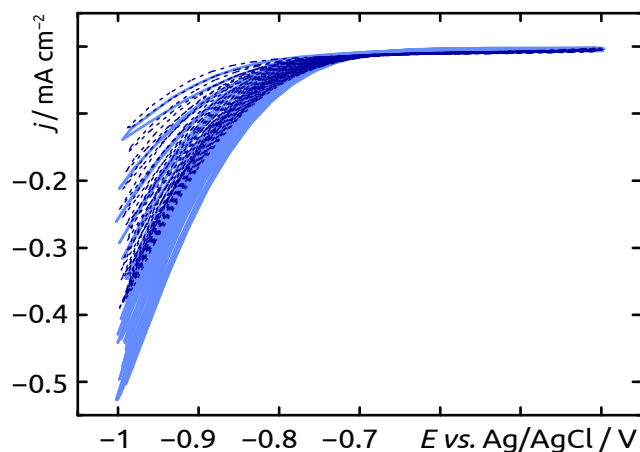

**Figure S2.** Cyclic voltammetry (CV) of fiber-based electrodes (electrospun for 6 h) with and without hydrogenase coating (solid light blue and dotted dark blue lines, respectively) recorded at  $50 \text{ mV s}^{-1}$  in buffer electrolyte (pH 8). The overpotential  $\eta$  is calculated from the experimental potential  $E$  measured vs. Ag/AgCl as  $\eta = E + 0.67 \text{ V}$ . The CVs were initiated at  $E = -0.40 \text{ V}$  and the first 20 cycles are displayed. The current increases over the course of the first 20 cycles for both samples in a similar manner.

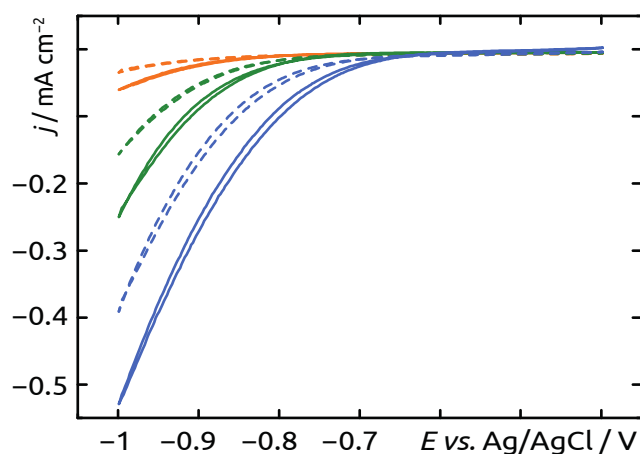

**Figure S3.** Cyclic voltammetry of fiber-based electrodes with three distinct fiber amounts: electrospun for 1 h (orange), 3 h (green), and 6 h (blue), before (dotted lines) and after hydrogenase treatment (continuous lines). The data were taken at  $50 \text{ mV s}^{-1}$  in buffer electrolyte (pH 8). The overpotential  $\eta$  is calculated from the experimental potential  $E$  measured vs. Ag/AgCl as  $\eta = E + 0.67 \text{ V}$ . The CVs were initiated at  $E = -0.40 \text{ V}$  and 19 cycles were performed before the cycle displayed was recorded.

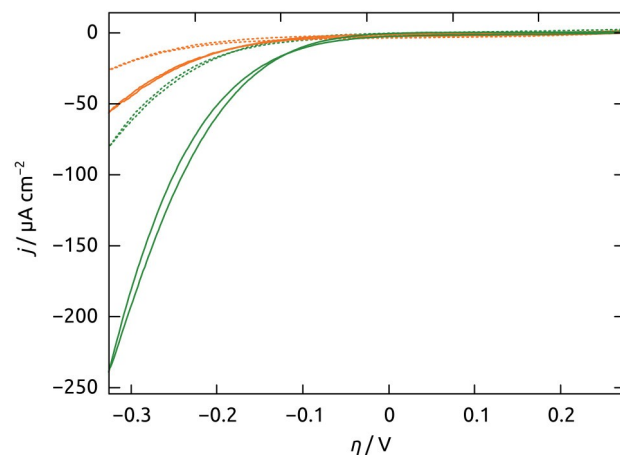

**Figure S4.** Cyclic voltammograms of two samples from **Figure S3** taken in the same conditions, freshly prepared (solid lines) and 7 hours later (dotted lines). The data serve as a control experiment: the activity loss corresponds to hydrogenase decomposition, and supports the assignment of the large initial electrochemical activity to the enzymes.
